# Supplementary material
Source: PubMed Central journal article supplement (PMC7661084)
Supplement: 20-00465.pdf [file 20-00465.pdf]

**On-line Table: Mixed subdural and intrathecal injections during LDDSM**

| Injection No. | Side Down | Contrast Amount/Type, Distribution                              | Needle Gauge | Action                                                                                 | Outcomes                                                                                                                                                          | Time to Resolution of Subdural Contrast (Next Day CTM/CT) |
|---------------|-----------|-----------------------------------------------------------------|--------------|----------------------------------------------------------------------------------------|-------------------------------------------------------------------------------------------------------------------------------------------------------------------|-----------------------------------------------------------|
| 1             | Left      | ≈ 6 mL Omnipaque 300 <sup>a</sup> mixed, predominantly subdural | 22           | Study terminated, no concurrent CTM; repeat LDDSM next day, left side down with CTM    | No CSF leak on either side on LDDSM/CTM                                                                                                                           | 20.5 hours                                                |
| 2             | Left      | ≈ 11 mL Omnipaque 300 mixed, predominantly subdural             | 22           | Study completed with concurrent CTM; repeat LDDSM next day, left side down with CTM    | No left CSF leak on day 1 (left side down) or next-day repeat left side down DSM or CTM images                                                                    | 24 hours                                                  |
| 3             | Right     | ≈ 11 mL Omnipaque 300 mixed, predominantly subdural             | 22           | Study completed with concurrent CTM; patient had chest/abdomen/pelvis CTA the next day | Right T6/T7 CSF-venous fistula on the right LDDSM                                                                                                                 | 28.5 hours                                                |
| 4             | Left      | ≈ 11 mL Omnipaque 300 mixed, predominantly subdural             | 20           | Study completed with concurrent CTM; next-day right-side-down LDDSM with CTM           | No left CSF leak on day 1 (left side down) with mixed injection<br>Right CSF leak presumably due to a dural tear at L2/L3 on day 2 (right LDDSM and same-day CTM) | 26 hours                                                  |
| 5             | Left      | ≈ 12 mL Omnipaque 240 mixed, predominantly intrathecal          | 20           | Study completed with concurrent CTM; next-day right-side-down LDDSM with CTM           | No CSF leak on either side on LDDSM/CTM                                                                                                                           | 22.5 hours                                                |
| 6             | Left      | ≈ 5 mL Omnipaque 300 mixed, predominantly subdural              | 22           | Study terminated, no concurrent CTM; repeat LDDSM next-day left side down with CTM     | No CSF leak on either side on LDDSM/CTM                                                                                                                           | 26 hours                                                  |

<sup>a</sup> GE Healthcare.
